# Supplementary material for: All-Carbon Electrode Consisting of Carbon Nanotubes on Graphite Foil for Flexible Electrochemical Applications
Source: MDPI journal article supplement (doi:10.3390/ma7031975), 2014-03-07

## Supplementary Information

**Figure S1.** Optical image of a bended carbon electrode, indicating high mechanical flexibility and robustness of both sides of the electrode.

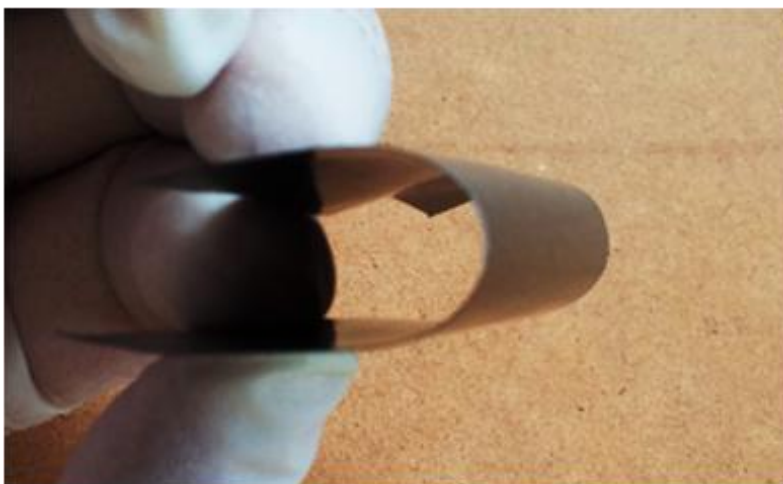

**Figure S2.** TEM image of tip area of CNT on all-carbon electrode.

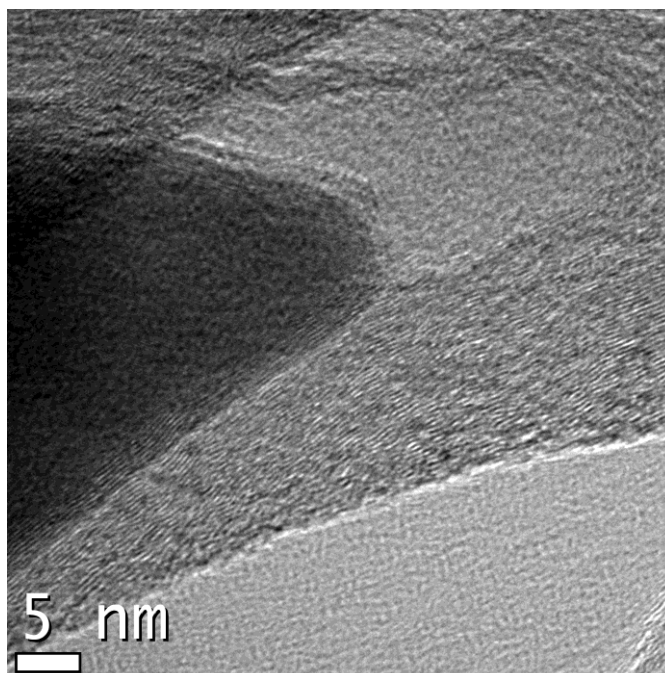

**Figure S3.** Rolling method of all-carbon electrode.

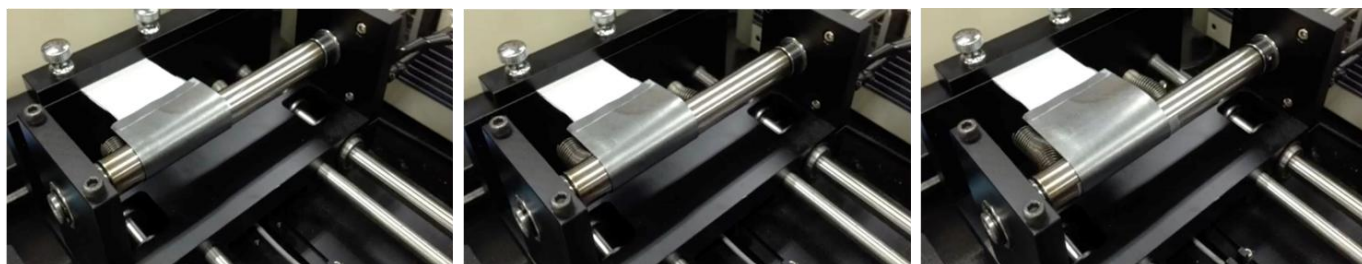

**Figure S4.** Cyclic voltammograms of (a) the graphite foil and (b) all-carbon electrode before rolling cycles in 1.0 mM  $\text{K}_3\text{Fe}(\text{CN})_6$  in DI water with addition of 0.1 M KCl at potential scan rates ranging from 10 to 200 mV/s. The corresponding peak current dependence on the square root of scan rate in (c) the graphite foil and (d) all-carbon electrode before rolling cycles.

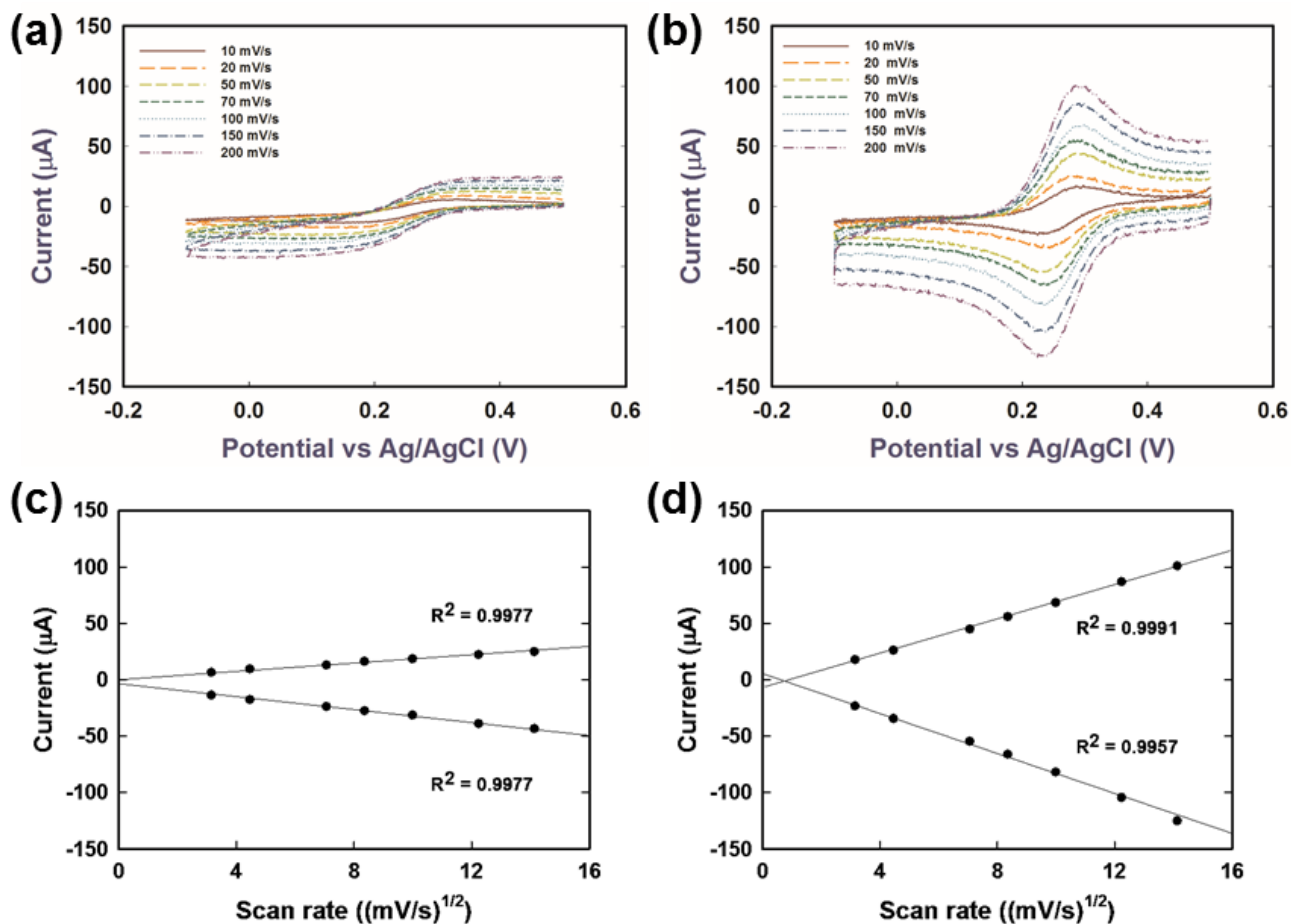

Supplement: s1 [file s1]
